# Supplementary material for: Study on contact angles and surface energy of MXene films
Source: Royal Society of Chemistry journal article supplement (doi:10.1039/d0ra09125a), 2021-01-01
Supplement: d0ra09125a1.pdf [file d0ra09125a1.pdf]

## **Supporting Information**

### **Study on contact angles and surface energy of MXene films**

Hang Zhou,<sup>a</sup> Fuqiang Wang,<sup>a</sup> Yuwei Wang,<sup>b</sup> Changping Li,<sup>b</sup> Changrui Shi,<sup>a</sup> Yu Liu,<sup>a</sup>

Zheng Ling<sup>a\*</sup>

<sup>a</sup>Key Laboratory of Ocean Energy Utilization and Energy Conservation of Ministry of Education, School of Energy & Power Engineering, Dalian University of Technology, Dalian 116024, China

<sup>b</sup>Research Center for Eco-Environmental Engineering, Dongguan University of Technology, Dongguan 523808, PR China

**\*Corresponding Author:**

E-mail: zling@dlut.edu.cn (Z. Ling).

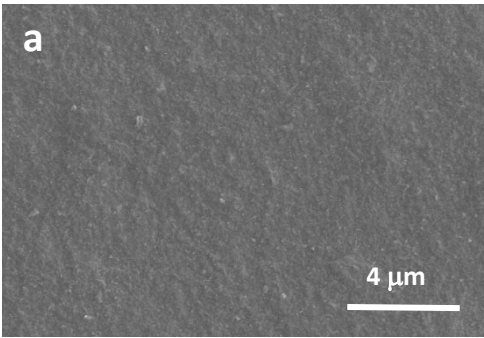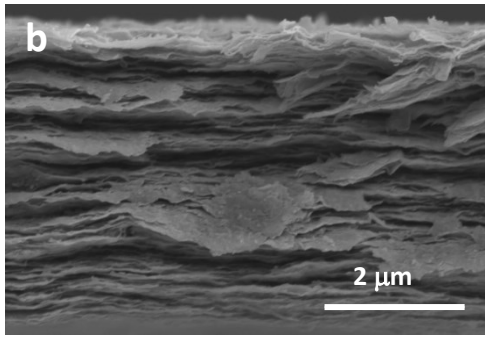

**Fig. S1** SEM images of fresh MXene film, (a) front surface and (b) cross-section. The loading of fresh MXene film is 1.0 mg/cm<sup>2</sup>.

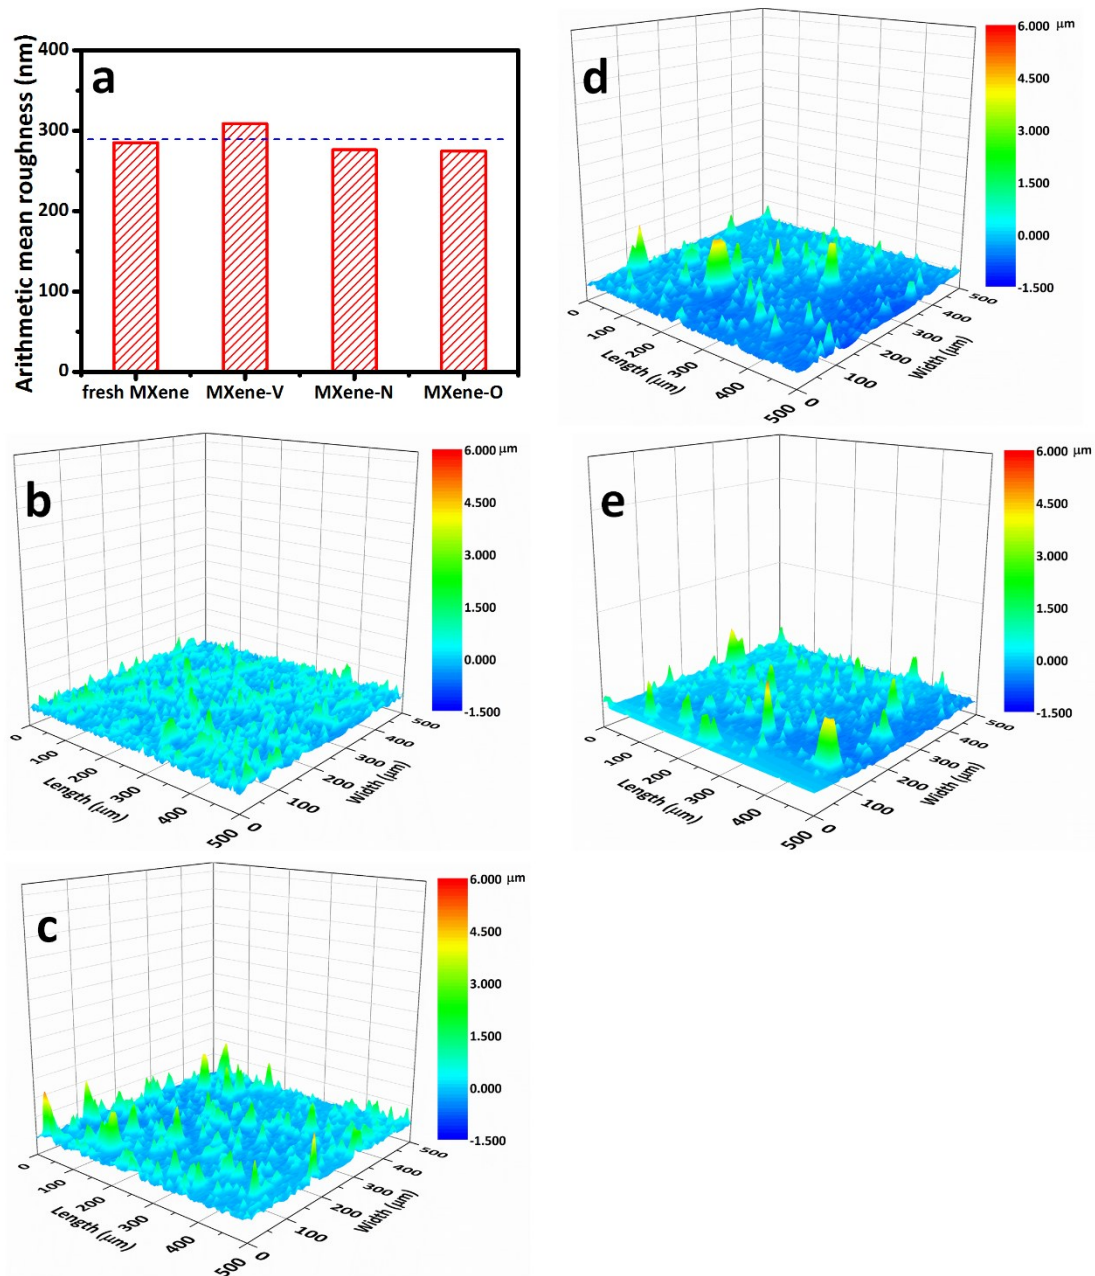

**Fig. S2** (a) Arithmetic mean roughness of fresh MXene film and MXene films after storing for 168 h. The 3D surface of (b) fresh MXene, (c) MXene-V, (d) MXene-N and (e) MXene-O. The loading of fresh MXene films, MXene-N, MXene-O, and MXene-V films is 1.0 mg/cm<sup>2</sup>.

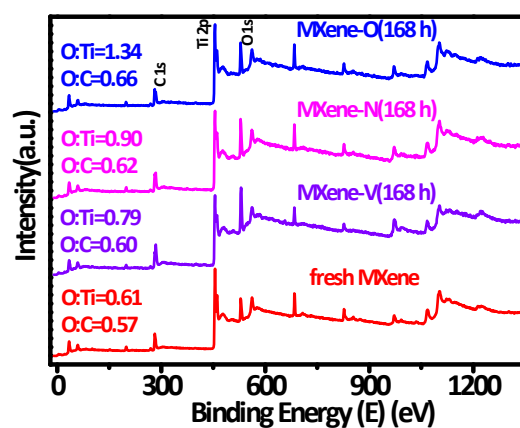

**Fig. S3** Broad scan XPS spectra of fresh MXene film and MXene films after storing for for 168 h. The loading of fresh MXene films, MXene-N, MXene-O, and MXene-V films is 1.0 mg/cm<sup>2</sup>.

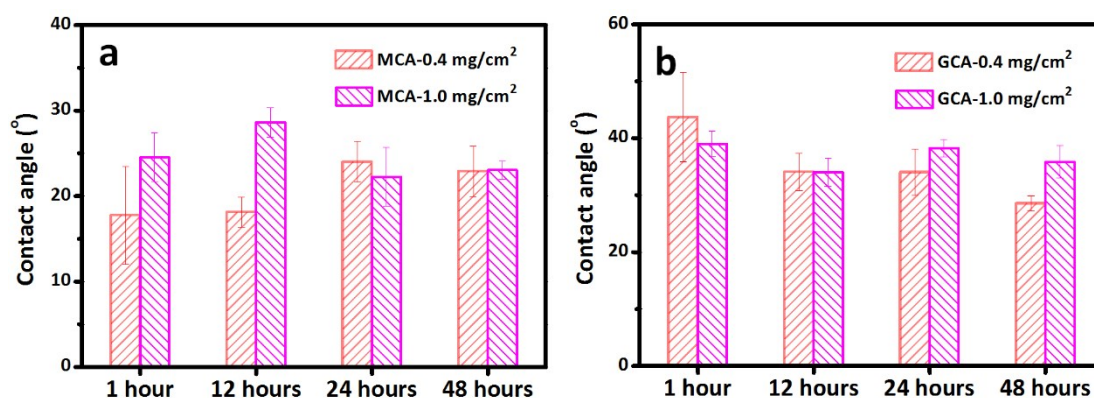

**Fig. S4** Time-dependent MCAs (a) and GCAs (b) of MXene films with mass loadings of 0.4 mg/cm<sup>2</sup> and 1.0 mg/cm<sup>2</sup>.

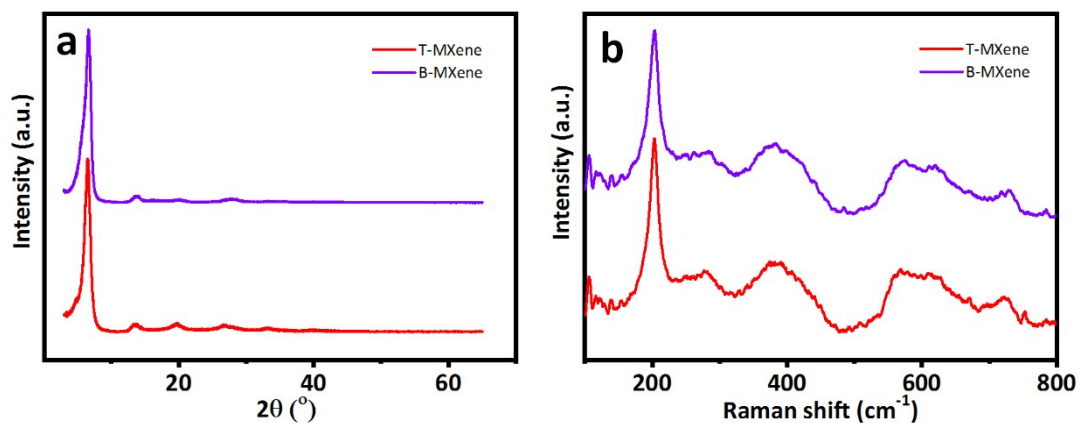

**Fig. S5** (a) XRD, (b) Raman spectra of T- $\text{Ti}_3\text{C}_2\text{T}_x$  and B- $\text{Ti}_3\text{C}_2\text{T}_x$  films.

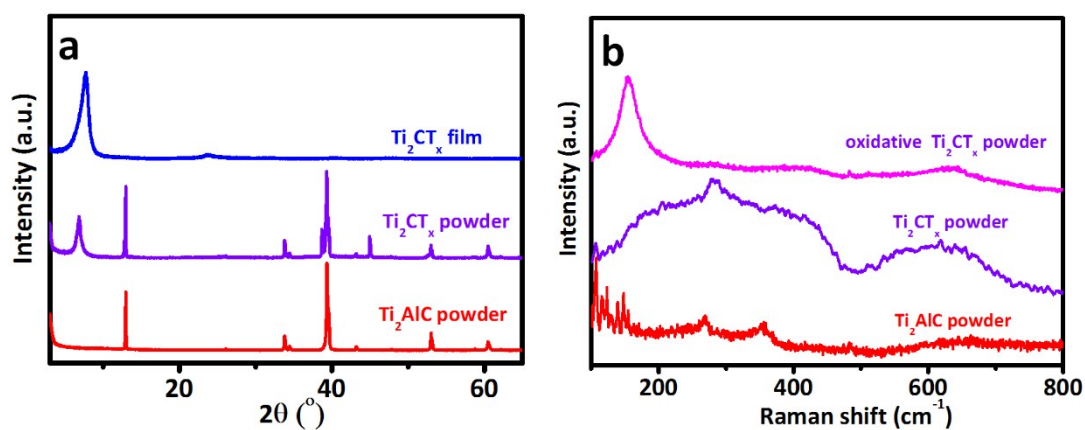

**Fig. S6** (a) XRD and (b) Raman of  $\text{Ti}_2\text{AlC}$  and  $\text{Ti}_2\text{CT}_x$  MXene.

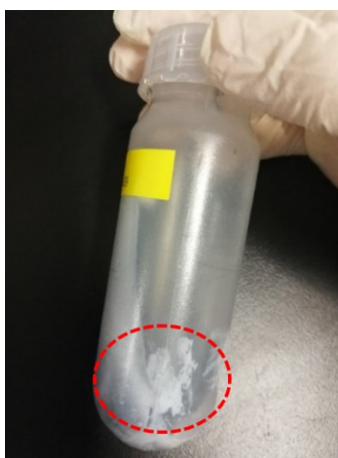

**Fig. S7** The photo of damaged  $\text{Ti}_2\text{CT}_x$  MXene by oxidation.

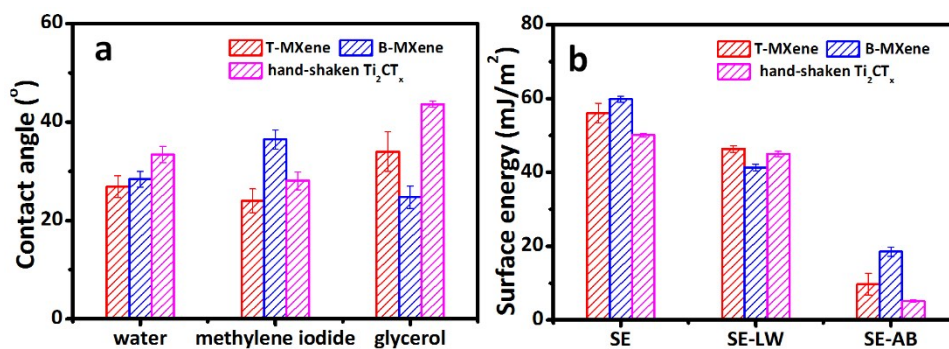

**Fig. S8** (a) CAs and (b) SE of MXene films assembled of  $\text{Ti}_3\text{C}_2\text{T}_x$  nanoflakes delaminated via tip sonication (T- $\text{Ti}_3\text{C}_2\text{T}_x$ ) and bath sonication (B- $\text{Ti}_3\text{C}_2\text{T}_x$ ), and  $\text{Ti}_2\text{CT}_x$  nanoflakes delaminated via hand-shaking. All the films have a mass loading of 0.4 mg/cm².
